# Supplementary material for: Micrococcin P1 and P2 from Epibiotic Bacteria Associated with Isolates of Moorea producens from Kenya
Source: MDPI journal article supplement (doi:10.3390/md20020128), 2022-02-07

## SUPPORTING INFORMATION (SI)

### SI Figure S1 Denaturation of *Moorea producens* DNA

$\text{CuSO}_4 \cdot 5\text{H}_2\text{O}$  assisted differential gDNA isolation of *Moorea producens*

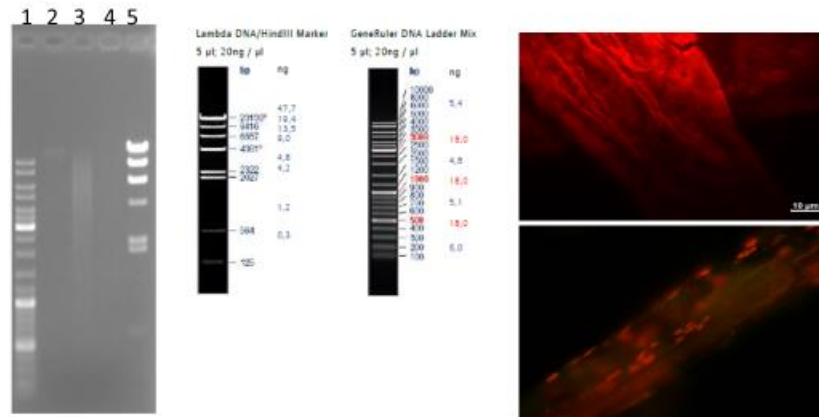

**Lane 1:** Gene ruler DNA ladder mix; **Lane 2:** *M. producens* treated with  $\text{CuSO}_4 \cdot 5\text{H}_2\text{O}$  for 30 min; **Lane 3 and Lane 4** *M. producens* treated with  $\text{CuSO}_4 \cdot 5\text{H}_2\text{O}$  for 90 min and 180 min respectively; **Lane 5:** Lambda DNA/Hind III marker. Top right – image of *M. producens* filament treated with  $\text{CuSO}_4 \cdot 5\text{H}_2\text{O}$  for 30 min. Bottom right – image of a dying *M. producens* filament. Photos taken by the author using a Leica DMIRB inverted microscope

## SI Figure S2. Blasted sequences

#1:1-879\_Kenyan\_Moorea\_producens\_Rep1

GGGAACCTGACCCAGCGACGCCSCGTGAGGGAAGACGGCCTYCGGGTTGTAAACCTCTT  
TTGTATGGGAAGAAGGATGTGACGGTACCATACGAATAAGTCCCGGCTAACTACGTGCCA  
GCAGCCGCGGTAATACGTAGGGGACGAGCGTTGTCCGGAATTACTGGGCGTAAAGGGCGC  
GCAGGCGGTTTGTCAAGTCAGCTGTAAAAATGGGGGCTTAACCCTCATA-TGCTGTTGA  
AACTGGCAGACTGGAGTGCTGTAGAGGCAAGTGGAATCCAGTGTAGCGGTGAAATGCG  
TAGATATTGGGAAGAACACCGGTGGCGAAGGCGACTTGCTGGGCAGCAACTGACGCTGAG  
GC

#1:1-636\_Kenyan\_Moorea\_producens\_Rep\_2

GGGAACCTGACCCAGCGACGCCGCGTGAGGGAAGACGGCCTTCGGGTTGTAAACCTCTT  
TTGTWTGGGAAGAAGGATGTGACGGTACCATACGAATAAGTCCCGGCTAACTACGTGCCA  
GCRGCCGCGGTAATACGTAGGGGACGAGCGTTGTCCGGAATTACTGGGCGTAAAGGGCGC  
GCAGGCGGTTTGTCAAGTCAGCTGTAAAAATGGGGGCTTAACCCTCATA-TGCTGTTGA  
AACTGGCAGACTGGAGTGCTGTAGAGGCAAGTGGAATCCAGTGTAGCGGTGAAATGCG  
TAGATATTGGGAAGAACACCGGTGGCGAAGGCGACTTGCTGGGCAGCAACTGACGCTGAG  
GC

#1:1-634\_Kenyan\_Moorea\_producens\_Rep\_3

GGGAACCTGACCCAGCGACGCCGCGTGAGGGAAGACGGCCTTCGGGTTGTAAACCTCTT

TTGTATGGGAAGAAGGATGTGACGGTACCATACGAATAAGTCCCGGCTAACTACGTGCCA  
GCAGCCGCGGTAATACGTAGGGGACGAGCGTTGTCCGGAATTACTGGGCGTAAAGGGCGC  
GCAGGCGGTTTGTCAAGTCAGCTGTAAAAATGGGGGCTTAACCTCATA-TGCTGTTGA  
AACTGGCAGACTGGAGTGCTGTAGAGGCAAGTGAATTCCAGTGTAGCGGTGAAATGCG  
TAGATATTGGGAAGAACACCGGTGGCGAAGGCGACTTGCTGGGCAGCAACTGACGCTGAG  
GC

#NR\_102462.1:1-1479\_*Cylindrospermum\_stagnale*\_16S\_rRNA,\_partial\_sequence

CGAAAGCCTGACGGAGCAATACCGCGTGAGGGAGGAAGGCTCTTGGGTTGTAAACCTCTT  
TTCTCAGGGAATAAA-AAATGAAGGTACCTGAGGAATAAGCATCGGCTAACTCCGTGCCA  
GCAGCCGCGGTAATACGGAGGATGCAAGCGTTATCCGGAATGATTGGGCGTAAAGCGTCC  
GCAGGTGGCTATGTAAGTCTGCTGTAAAGAGCAAGGCTCAACCTTGTAAGGCAGTGGA  
AACTACATAGCTAGAGTGCGTTCGGGGCAGAGGGAATTCCTGGTGTAGCGGTGAAATGCG  
TAGATATCAGGAAGAACACCGGTGGCGAAAGCGCTCTGCTAGGCCGCAACTGACACTGAG  
GG

#JX912466.1:1-889\_*Halospirulina\_sp.*\_EF17(2012)\_16S\_rRNA\_gene,\_partial\_sequence

CGAAAGCCTGACGGAGCAATGCCGCGTGAGGTAGAAGGCCACGGGTCGTGAACTTCTT  
TTCCCGGAGAAGAAGCAA-TGACGGTATCTGGGGAATAAGCATCGGCTAACTCTGTGCCA  
GCAGCCGCGGTAATACAGAGGATGCAAGCGTTATCCGGAATGATTGGGCGTAAAGCGTCT  
GTAGGTGGCTTTTTAAGTCCGCGTCAAATCCCAGGGCTCAACCCTGGACAGGCGGTGGA  
AACTACCAAGCTGGAGTACGGTAGGGGCAGAGGGAATTTCCGGTGGAGCGGTGAAATGCG

TAGAGATCGGAAAGAACACCAACGGCGAAAGCACTCTGCTGGGCCGACACTGACACTGAG

AG

#AF510976.1:1-604\_*Lyngbya\_majuscula*\_CCAP\_1446/4\_Rep\_1

CGCAAGCCTGACGGAGCAAGACCGCGTGGGGGAGGAAGGCTCTTGGGTTGTAAACCCCTT

TTCTCAGGGAAGAACCAAATGACGGTACCTGAGGAATCAGCCTCGGCTAACTCCGTGCCA

GCAGCCGCGGTAATACGGAGGAGGCAAGCGTTATCCGGAATGATTGGGCGTAAAGCGTTC

GTAGGTGGCTATTCAAGTCTGCTGTCAAAGACAGAAGCTCAACTTCCGAAAGGCAGTGGA

AACTGAGTAGCTGGAGTGCGGTAGGGGCAGAGGGAATCCCGGTGTAGCGGTGAAATGCG

TAGAGATCGGGAAGAACACCGGTGGCGAAAGCGCTCTGCTGGGCCGCAACTGACACTGAG

GG

#AF510967.1:1-604\_*Lyngbya\_majuscula*\_CCAP\_1446/4\_Rep\_2

CGCAAGCCTGACGGAGCAAGACCGCGTGGGGGAGGAAGGCTCTTGGGTTGTAAACCCCTT

TTCTCAGGGAAGAACCAAATGACGGTACCTGAGGAATCAGCCTCGGCTAACTCCGTGCCA

GCAGCCGCGGTAATACGGAGGAGGCAAGCGTTATCCGGAATGATTGGGCGTAAAGCGTTC

GTAGGTGGCTATTCAAGTCTGCTGTCAAAGACAGAAGCTCAACTTCTGAAAGGCAGTGGA

AACTGAGTAGCTGGAGTGCGGTAGGGGCAGAGGGAATCCCGGTGTAGCGGTAAAATGCG

TAGAGATCGGGAAGAACACCGGTGGCGAAAGCGCTCTGCTGGGCCGCAACTGACACTGAG

GG

#AF368300.1:1-585\_*Lyngbya\_majuscula*

CGCAAGCCTGACGGAGCAAGACCGCGTGGGGGAGGAAGGCTCTTGGGTTGTAAACCCCTT

TTCTCAGGGAAGAACCAAATGACGGTACCTGAGGAATCAGCCTCGGCTAACTCCGTGCCA  
GCAGCCGCGGTAATACGGAGGAGGCAAGCGTTATCCGGAATGATTGGGCGTAAAGCGTTC  
GTAGGTGGCTATTCAAGTCTGCTGTCAAAGACAGAAGCTCAACTTCTGAAAGGCAGTGGA  
AACTGAGTAGCTGGAGTGCGGTAGGGGCAGAGGGAATTCCCGGTGTAGCGGTGAAATGCG  
TAGAGATCGGGAAGAACACCGGTGGCGAAAGCGCTCTGCTGGGCCGCAACTGACACTGAG  
GG

#JX912376.1:1-854\_*Planktothricoides\_sp.\_EA12*(2012)

CGAAAGCCTGACGGAGCAATGCCGCGTGGAGGTAGAAGGCCACGGGTCGTGAACCTTCTT  
TTCCCGGAGAAGAAGCAA-TGACGGTATCTGGGGAATAAGCATCGGCTAACTCTGTGCCA  
GCAGCCGCGGTAATACAGAGGATGCAAGCGTTATCCGGAATGATTGGGCGTAAAGCGTCT  
ATAGGTGGCTTTTTAAGTCCGCCGTCAAATCCCAGGGCTCAACCCTGGACAGGCGGTGGA  
AACTACCAAGCTGGAGTACGGTAGGGGCAGAGGGAATTTCCGGTGGAGCGGTGAGATGCG  
TAGAGATCGGAAAGAACACCAACGGCGAAAGCACTCTGCTGGGCCGACACTGACACTGAG  
AG

#EF613820.1:1-803\_*Uncultured\_cyanobacterium\_clone\_GA94\_16S\_rRNA\_gene*

CGCAAGCCTGACCCAGCAACGCCGCGTGAGGGAAGAAGGTCTTCGGATTGTAAACCTCTG  
TCCTTGGGGACGAAAAAATGACGGTACCCAAGGAGGAAGCTCCGGCTAACTACGTGCCA  
GCAGCCGCGGTAATACGTAGGGAGCGAGCGTTGTCCGGAATTACTGGGCGTAAAGGGTGC  
GTAGGCGGCCTAGCAAGTCAGATGTGAAATCCCCGGGCTTAACTCGGGGGGTGCATTTGA  
AACTGCTTGGCTTGAGTGCAGGAGAGGAAAGCGGAATTCCTAGTGTAGCGGTGAAATGCG

TAGATATTAGGAAGAACACCAGTGGCGAAGGCGGCTTTCTGGACTGCAACTGACGCTGAG

GC

#HE578055.1:1-1094\_Uncultured\_Oscillatoriales\_cyanobacterium\_partial\_16S\_rRNA\_gene,\_clone\_TPB\_GMAT\_CYANO\_26

CGAAAGCCTGACGGAGCAATGCCGCGTGGAGGTAGAAGGCCACGGGTCGTGAACCTCTT

TTCCCGGAGAAGAAGCAA-TGACGGTATCTGGGGAATAAGCATCGGCTAACTCTGTGCCA

GCAGCCGCGGTAATACAGAGGATGCAAGCGTTATCCGGAATGATTGGGCGTAAAGCGTCT

GTAGGTGGCTTTTTAAGTCCGCCGTCAAATCCCAGGGCTCAACCCTGGACAGGCGGTGGA

AACTACCAAGCTGGAGTACGGTAGGGGCAGAGGGAATTTCCGGTGGAGCGGTGAAATGCG

TAGAGATCGGAAAGAACACCAACGGCGAAAGCACTCTGCTGGGCCGACACTGACACTGAG

AG

#HE979756.1:1-598\_Uncultured\_Oscillatoriales\_cyanobacterium\_partial\_16S\_rRNA\_gene,\_DGGE\_band\_CYA28

CGAAAGCCTGACGGAGCAAGACCGCGTGAGGGAAGACGGCCTATGGGTTGTAAACCTCTT

TTGATAGGGAAGAAG-GACTGACGGTACCTATCGAATCAGCCTCGGCTAACTCCGTGCCA

GCAGCCGCGGTAATACGGAGGAGGCAAGCGTTATCCGGAATTATTGGGCGTAAAGCGTCC

GTAGGTGGTTGGTCAAGTCAGCTGTAAAGCGCGGAGCTTAACTCCGTAACGGCAGTGGA

AACTGGTCAGCTAGAGTGCATAGGGGCAAGGGGAATTTCCAGTGTAGCGGTGAAATGCG

TAGATATTGGGAAGAACACCGGTGGCGAAAGCGCCTTGCTGGGCCTGCACTGACACTGAG

GG

SI Figure S3      Micrococcin P1 and P2 chromatogram (MS and UV at 220 nm)

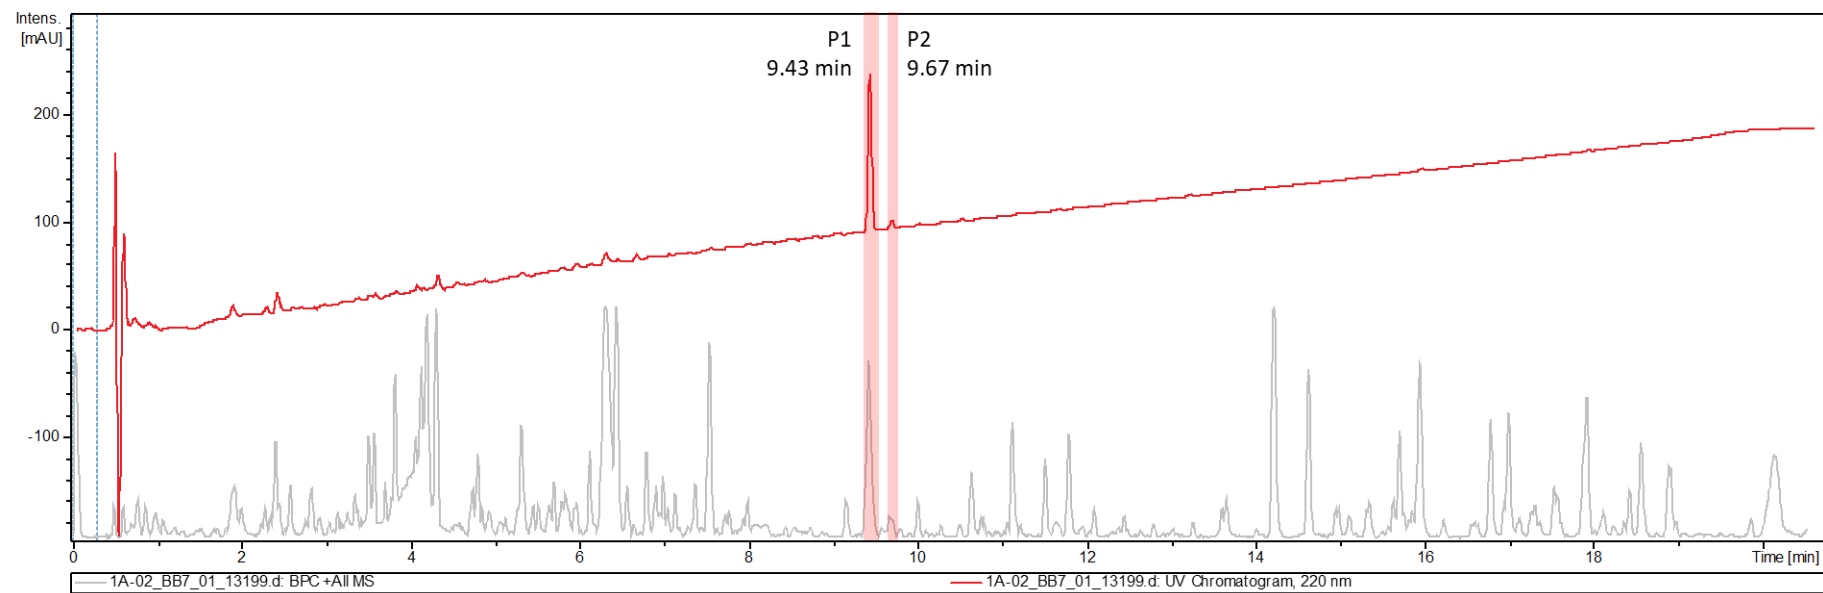

SI Figure S4      Micrococcin P1 MS/MS spectrum

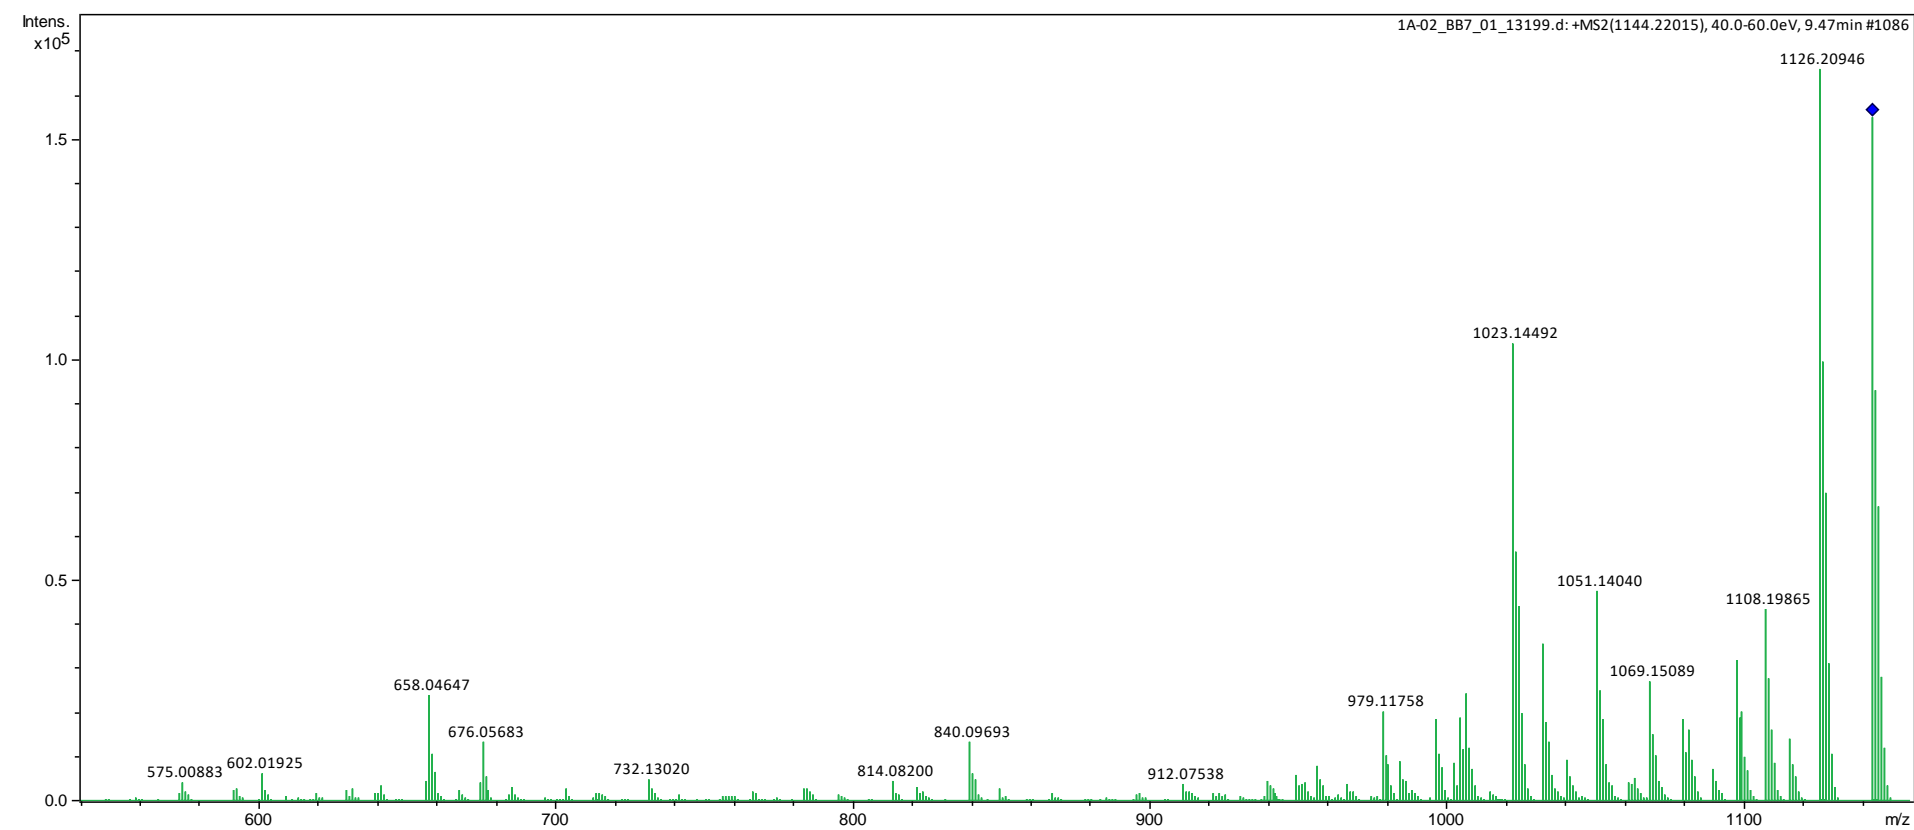



SI Figure S5      Micrococcin P1 annotated MS/MS spectrum

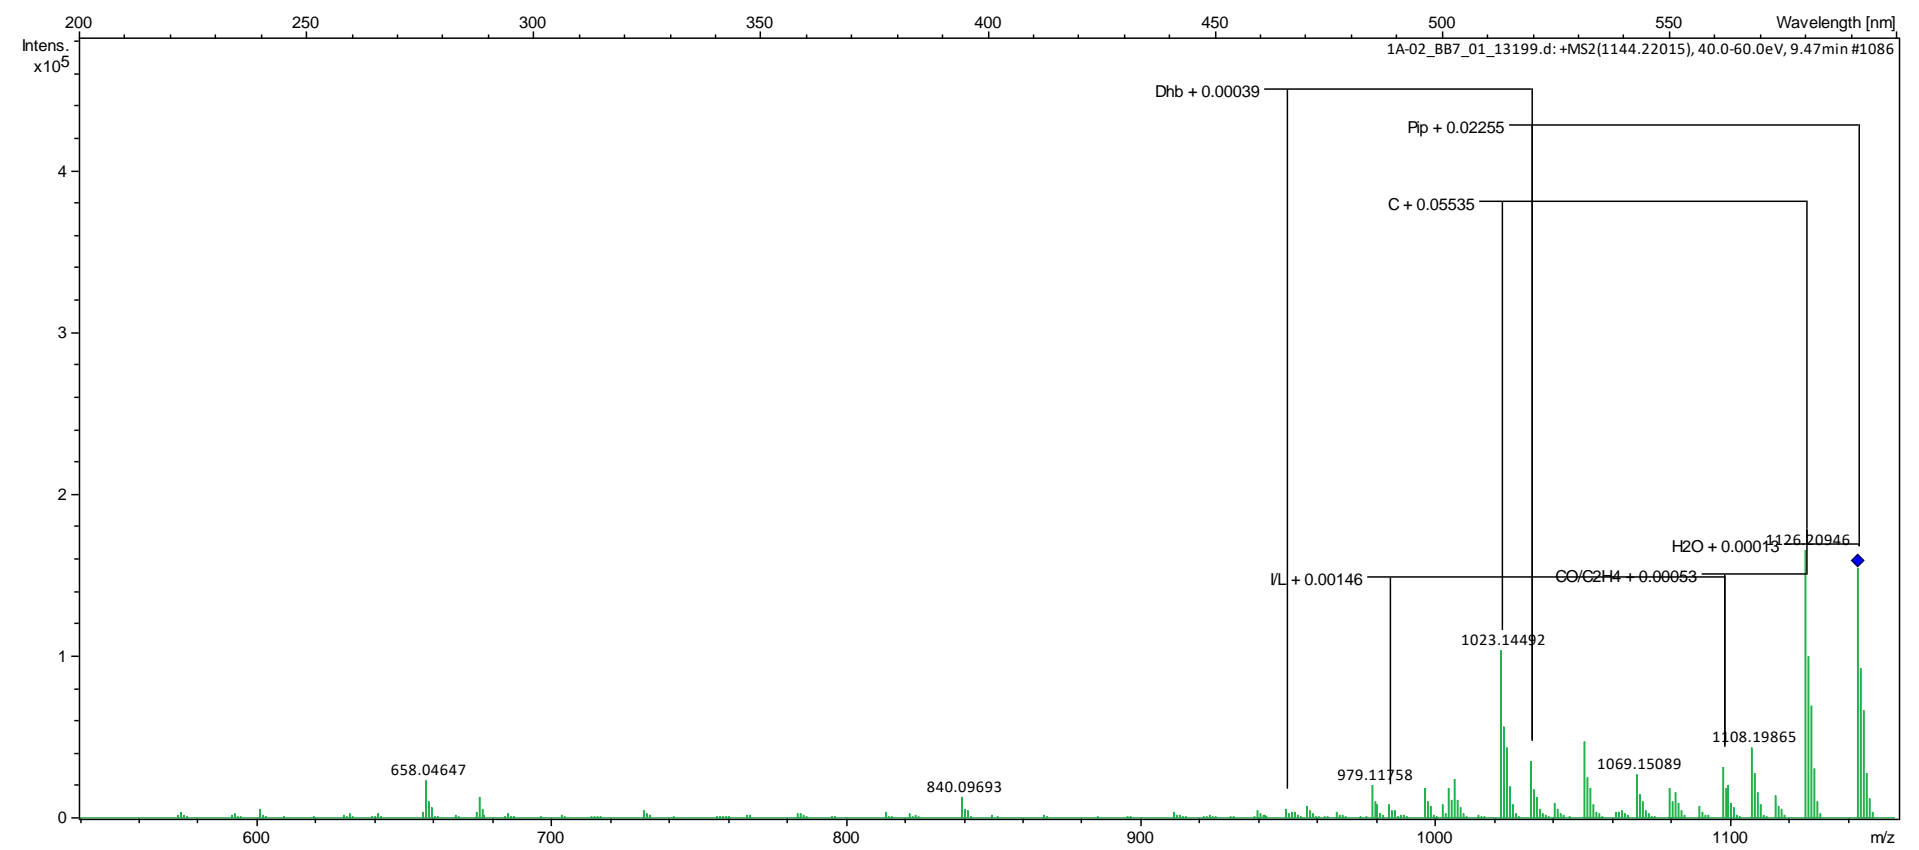

SI Figure S6      Micrococcin P2 MS/MS spectrum

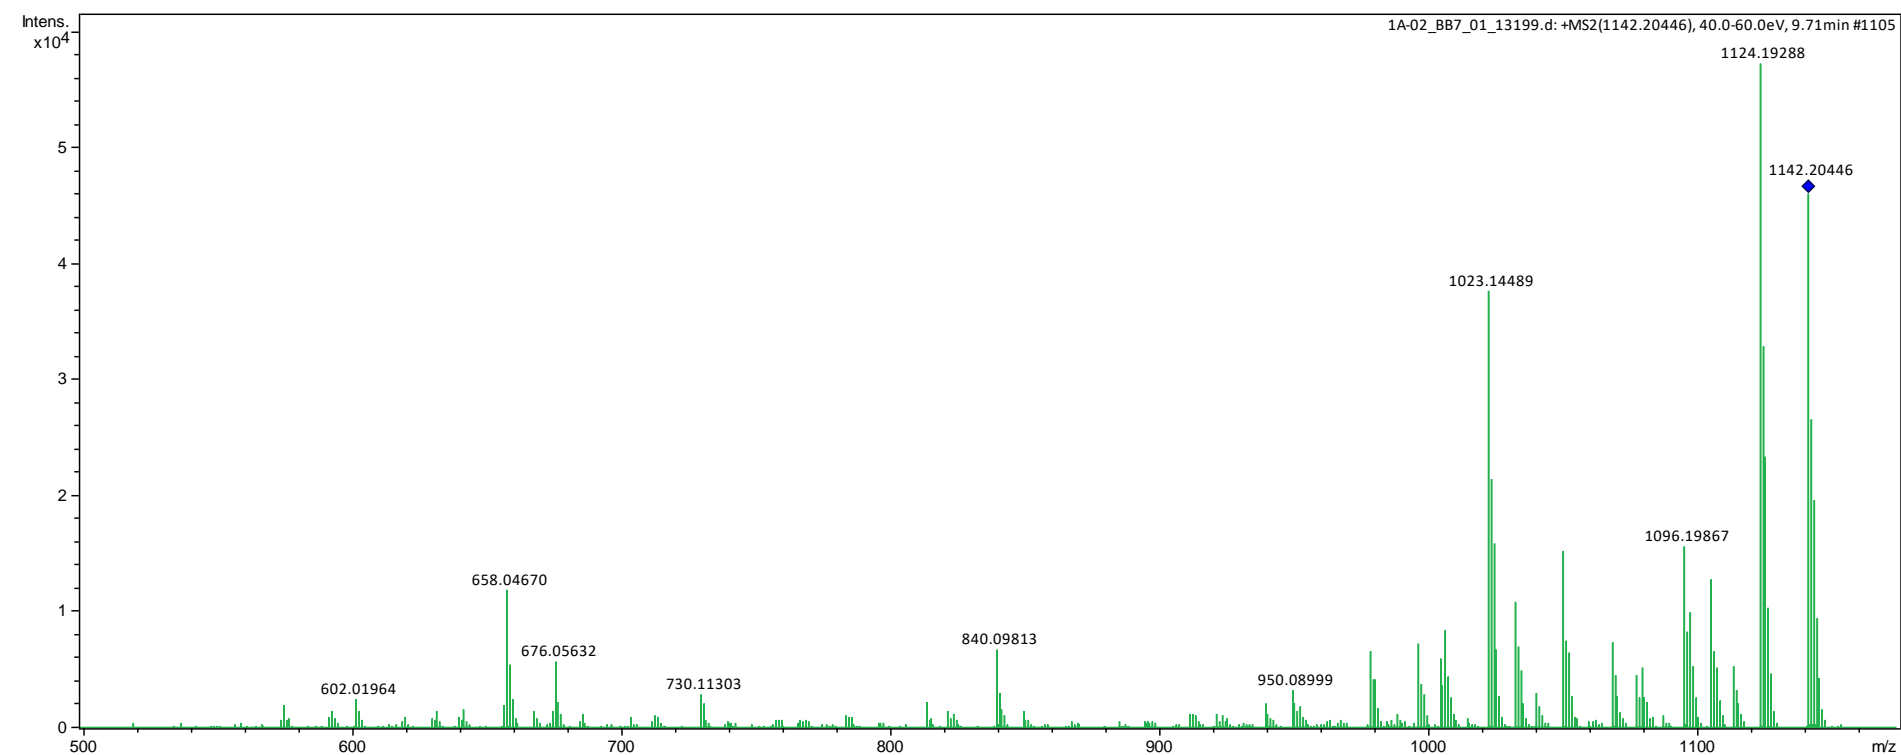

**SI Figure S7    Micrococcin P2 annotated MS/MS spectrum**

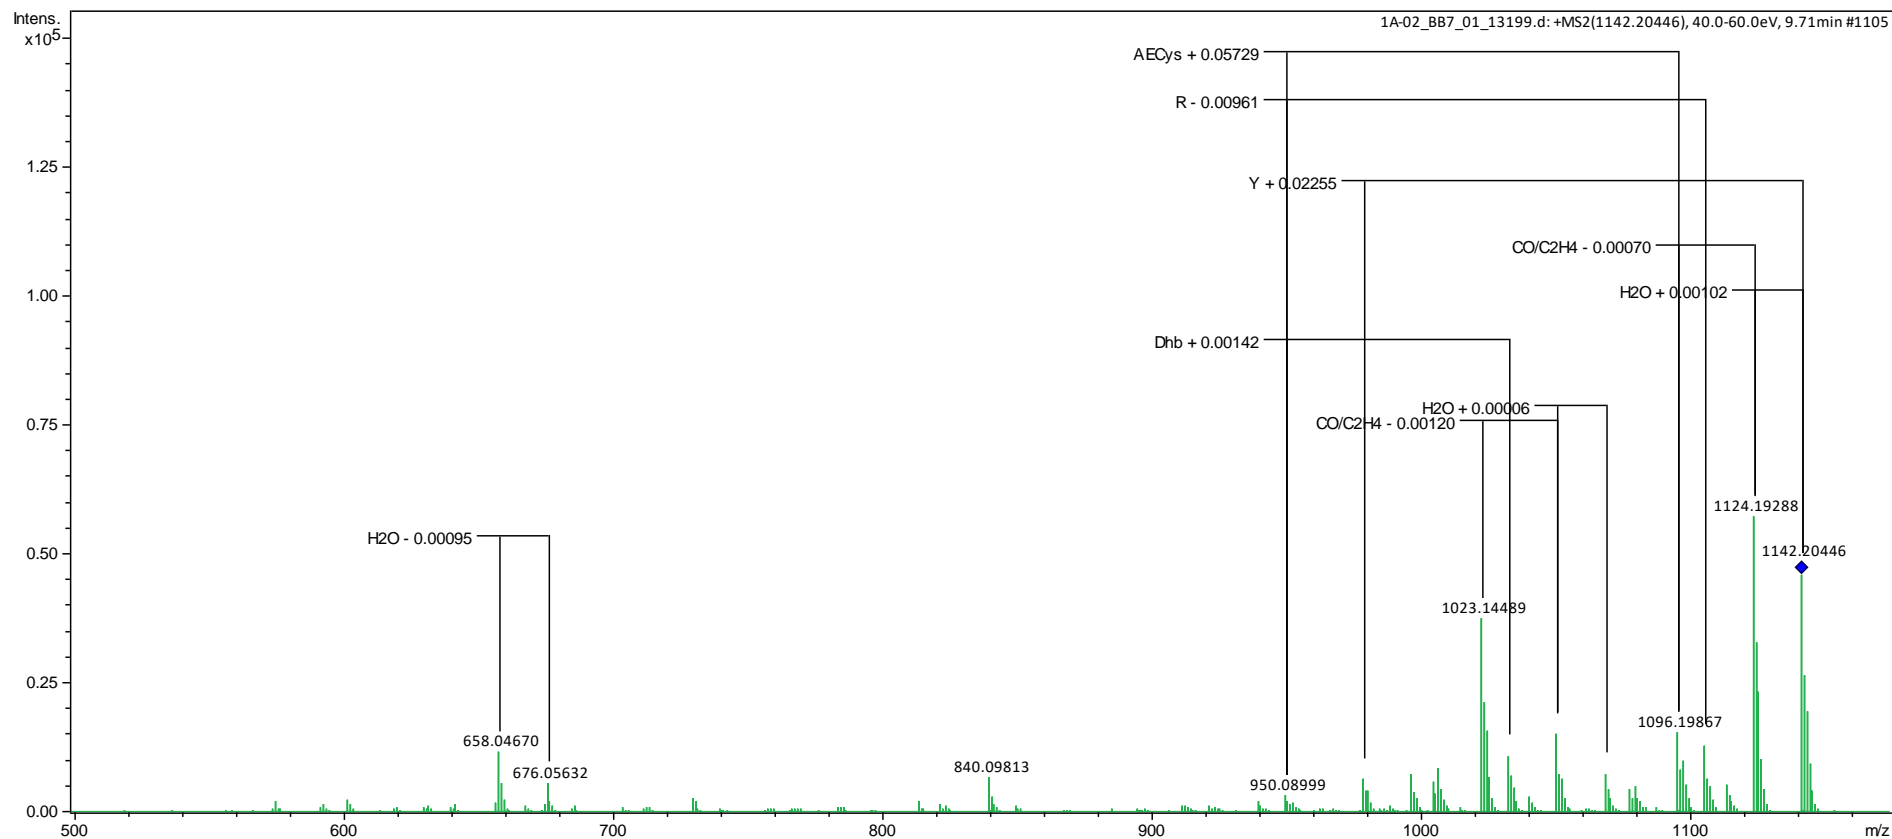

SI Figure S8 Activity of micrococcin P1 against *S. aureus* Newman

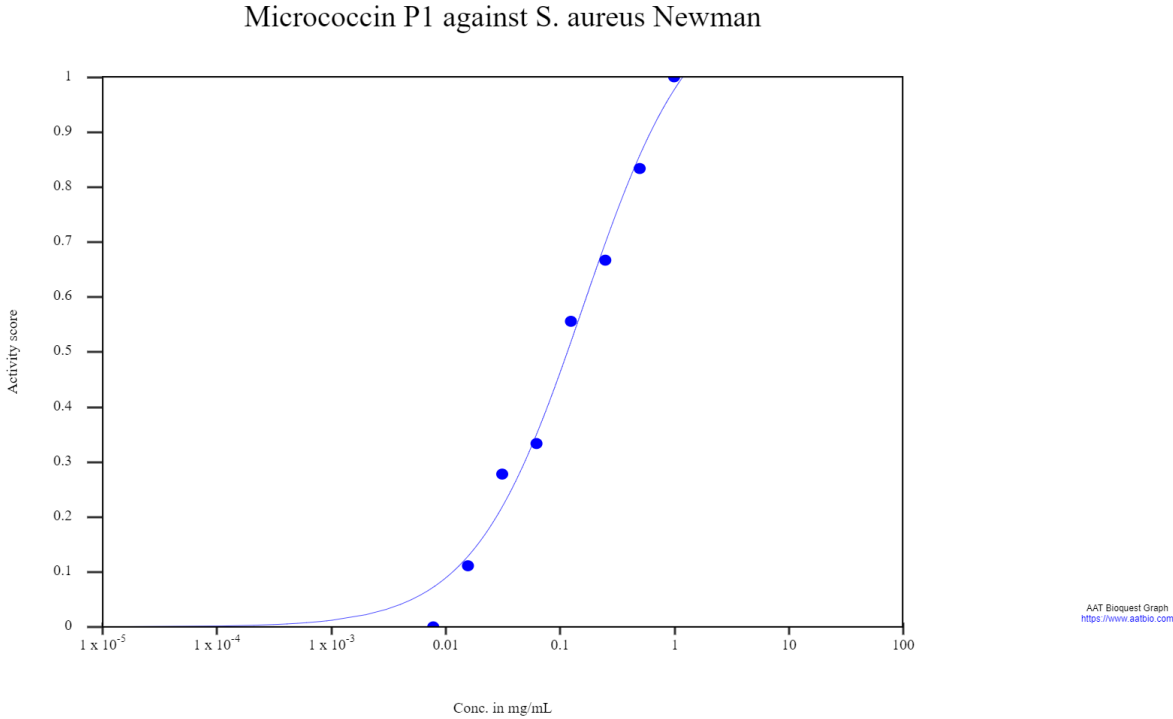

Supplement: s1 [file s1]
